# Supplementary material for: Endothelin receptor-specific control of endoplasmic reticulum stress and apoptosis in the kidney
Source: PubMed Central journal article supplement (PMC5322462; doi:10.1038/srep43152), 2017-02-23

**SUPPLEMENTARY INFORMATION FOR** *“Endothelin receptor-specific control of endoplasmic reticulum stress and apoptosis in the kidney”* by Carmen De Miguel, William C. Hamrick, Janet L. Hobbs, David M. Pollock, Pamela K. Carmines, and Jennifer S. Pollock.

**Supplementary Table 1.** Sequence for ER stress primers used for RT-PCR.

| Gene name  | Sequence                                     |
|------------|----------------------------------------------|
| GRP78      | F: AAC CCA GAT GAG GCT GTA GCA <sup>56</sup> |
|            | R: ACA TCA AGC AGA ACC AGG TCA C             |
| ATF-4      | F: TAT GGA TGG GTT GGT CAG TG <sup>57</sup>  |
|            | R: CTC ATC TGG CAT GGT TTC C                 |
| ATF-6      | F: GAT TTG ATG CCT TGG GAG TC <sup>57</sup>  |
|            | R: GGA CCG AGG AGA AGA GAC AG                |
| sXBP-1     | F: CTG AGT CCG AAT CAG GTG CAG <sup>58</sup> |
|            | R: GGT CTT GTA GAA GGG TAC CTA               |
| CHOP       | F: CCA GCA GAG GTC ACA AGC AC <sup>56</sup>  |
|            | R: CGC ACT GAC CAC TCT GTT TC                |
| Caspase 12 | F: CAC TGC TGA TAC AGA TGA GG <sup>56</sup>  |
|            | R: CCT TCC ATC CGT TCT CAC C                 |

## SUPPLEMENTARY FIGURE LEGENDS

**Supplementary Figure 1. Treatment with tunicamycin does not alter renal infiltration of macrophages or T-lymphocytes.** Average numbers of macrophages (ED-1<sup>+</sup> cells; a) and T lymphocytes (CD3<sup>+</sup> cells; b) present per field in renal cortex and outer medulla of TG-con and ETB def rats treated with saline or tunicamycin ( $n = 5/$  group). Statistical significance was tested by two-way ANOVA.

**Supplementary Figure 2. Treatment with tunicamycin leads to thickening of the outer medullary vasa recta in both experimental genotypes,** as demonstrated by periodic acid Schiff (PAS) staining. Bar = 50  $\mu$ m. 0 and 1 correspond to absence or presence of thickening, respectively. Statistical significance was tested by two-way ANOVA ( $n = 5/$  group).

**a**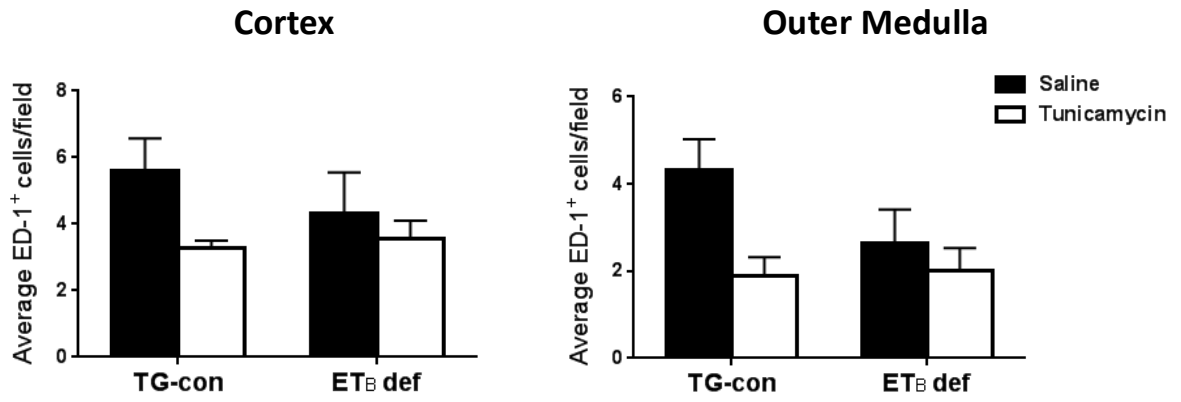**b**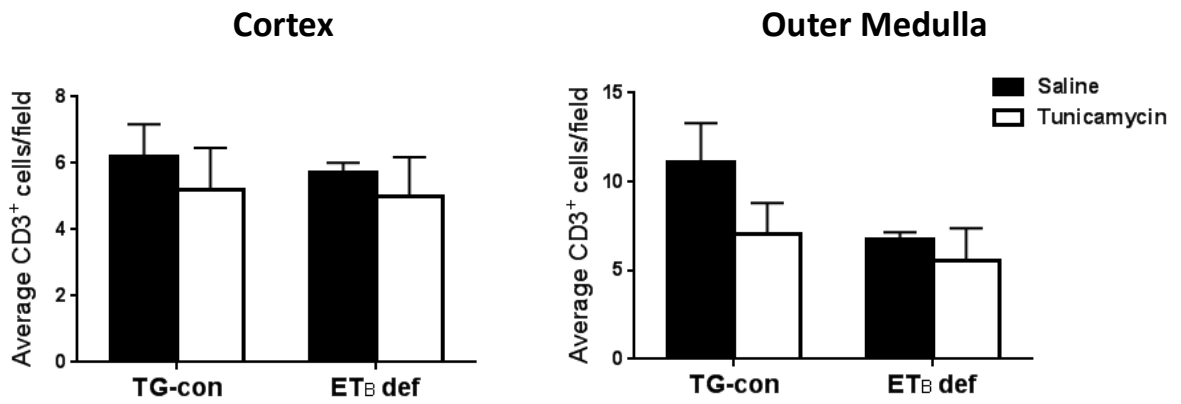

**Saline**

**Tunicamycin**

**TG-con**

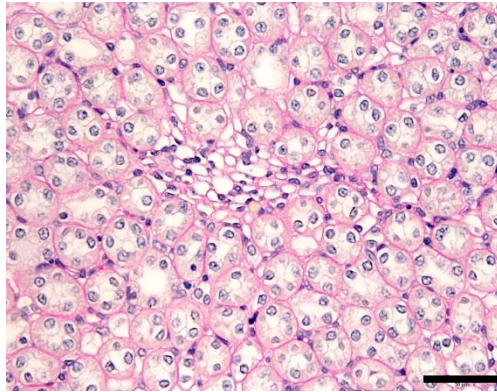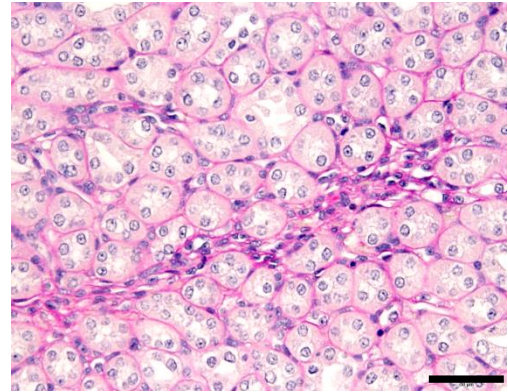

**ET<sub>B</sub> def**

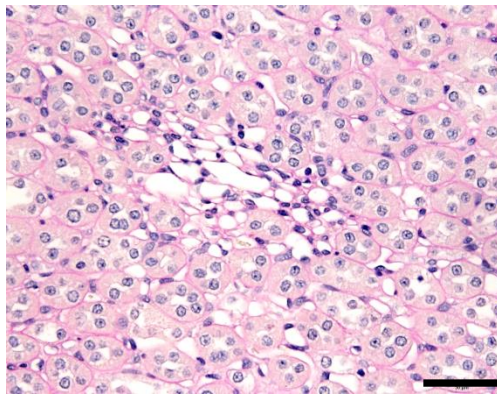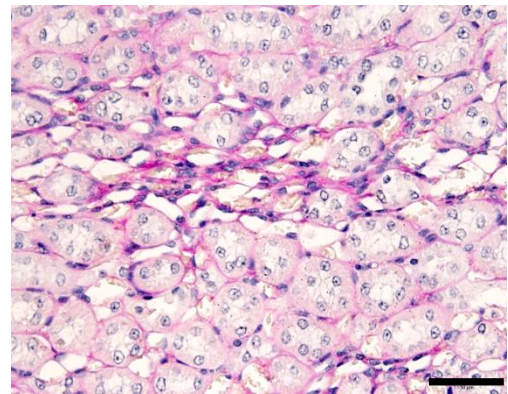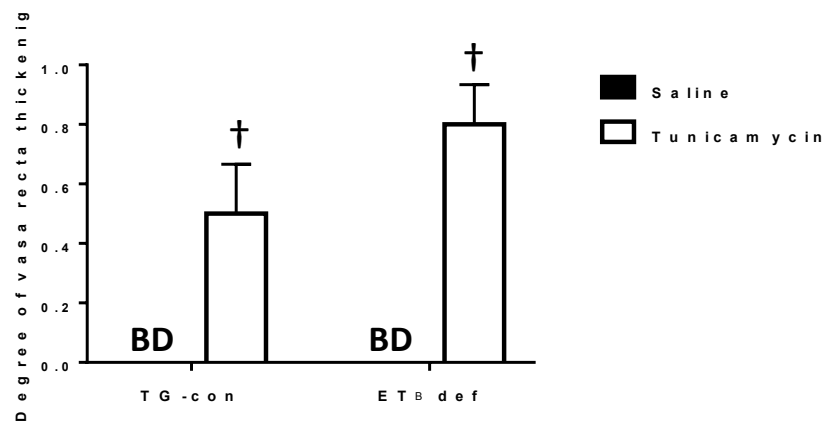

Supplement: srep43152-s1.pdf [file srep43152-s1.pdf]
